# Supplementary material
Source: MDPI journal article supplement (https://www.mdpi.com/2076-3417/10/7/2590)
Supplement: s1 [file s1]

# Supplementary Materials: UVI Image Segmentation of Auroral Oval: Dual Level Set and Convolutional Neural Network Based Approach

Chenjing Tian, Huadong Du, Pinglv Yang, Zeming Zhou and Libin Weng

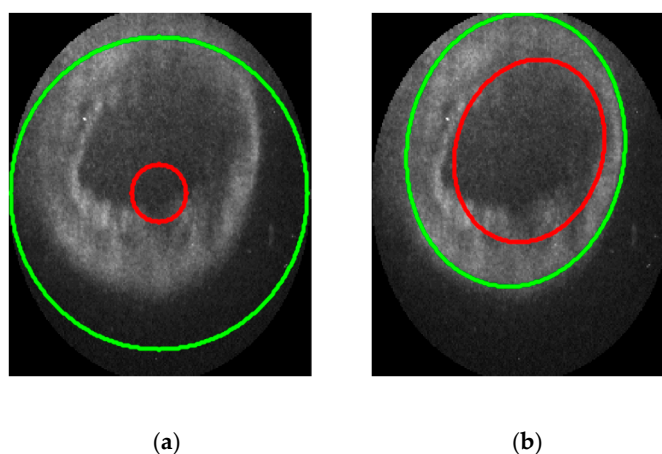

**Figure S1.** The contour initializations of different methods when segmenting the first UVI image in Section 4.3.1. (a) Initial level set curves (concentric circles) of DFALS. (b) Initial level set curves (LLS-RHT result) of SIILSM and LIDLSM.

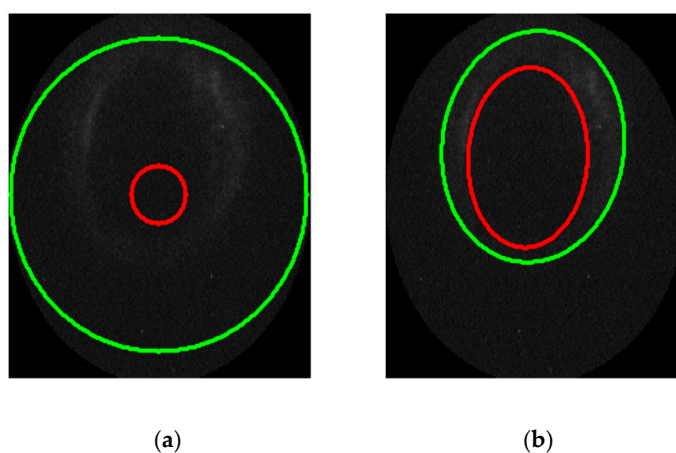

**Figure S2.** The contour initializations of different methods when segmenting the second UVI image in Section 4.3.1. (a) Initial level set curves (concentric circles) of DFALS. (b) Initial level set curves (LLS-RHT result) of SIILSM and LIDLSM.

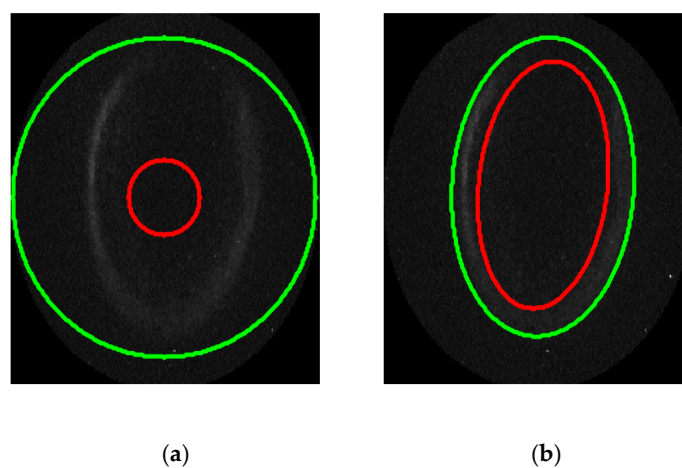

**Figure S3.** The contour initializations of different methods when segmenting the third UVI image in Section 4.3.1. **(a)** Initial level set curves (concentric circles) of DFALS. **(b)** Initial level set curves (LLS-RHT result) of SIIALSM and LIDLSM.
